# Supplementary material for: Computational Design of a Molecularly Imprinted Polymer for the Biomonitoring of the Organophosphorous Metabolite Chlorferron
Source: MDPI journal article supplement (doi:10.3390/bios11060192), 2021-06-10
Supplement: s1 [file s1]

Article

# Computational Design of a Molecularly Imprinted Polymer for the Biomonitoring of the Organophosphorous Metabolite Chlorferron

Bakhtiyar Qader <sup>1,2</sup>, Issam Hussain <sup>3</sup>, Mark Baron <sup>2</sup>, Rebeca Jiménez-Pérez <sup>2,4</sup>, Guzmán Gil-Ramírez <sup>2</sup> and Jose Gonzalez-Rodriguez <sup>2,\*</sup>

<sup>1</sup> Sulaimani Medicolegal Institute, Qanat Street, Sulaimani, Sulaymaniyah, 46001, Kurdistan Regional Government, Iraq; bakhtyar88@gmail.com

<sup>2</sup> Joseph Banks Laboratories, School of Chemistry, University of Lincoln, Lincoln LN6 7DL, UK; mbaron@lincoln.ac.uk (M.B.); Rebeca.Jimenez@uclm.es (R.J.-P.); GGilramirez@lincoln.ac.uk (G.G.-R.)

<sup>3</sup> School of Life Sciences, University of Lincoln, Brayford Pool, Lincoln LN6 7TS, UK; ihussain@lincoln.ac.uk

<sup>4</sup> Department of Physical Chemistry, Higher Technical School of Industrial Engineering, University of Castilla-La Mancha, Campus Universitario s/n, 02071 Albacete, Spain

\* Correspondence: jgonzalezrodriguez@lincoln.ac.uk

## Supplementary Materials:

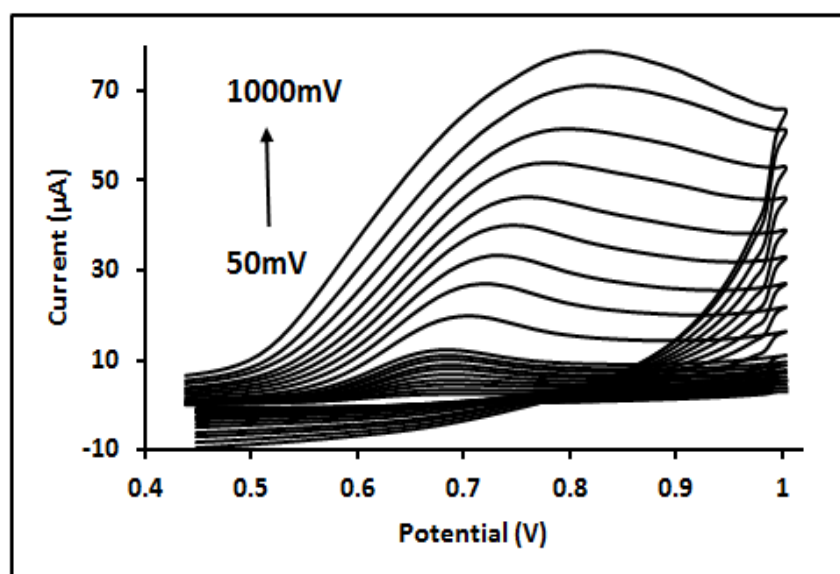

**Figure S1.** Cyclic voltammogram of 0.05mM CFN in 0.1M BR buffer solution (pH, 7) on bare GC electrode at scan rates ranging (50–1000) mV/s.

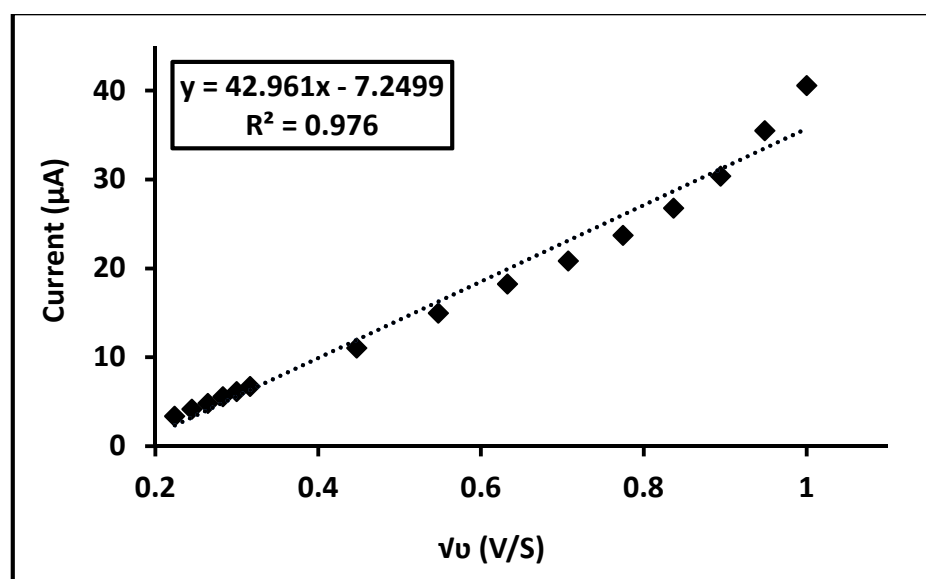

**Figure S2.** Relationship between peak current intensity of 0.05mM CFN and square root of scan rates ranging from 50–1000 mV/s.

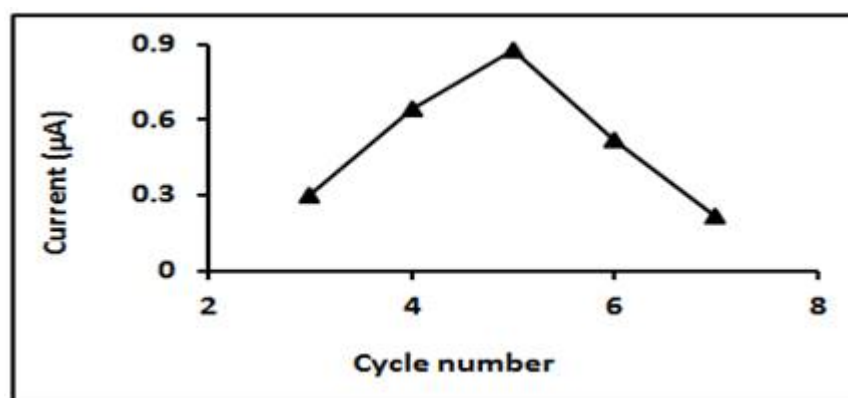

**Figure S3.** Current response related to number of scan cycles used during electro polymerization of CFN-Py on GC electrode.

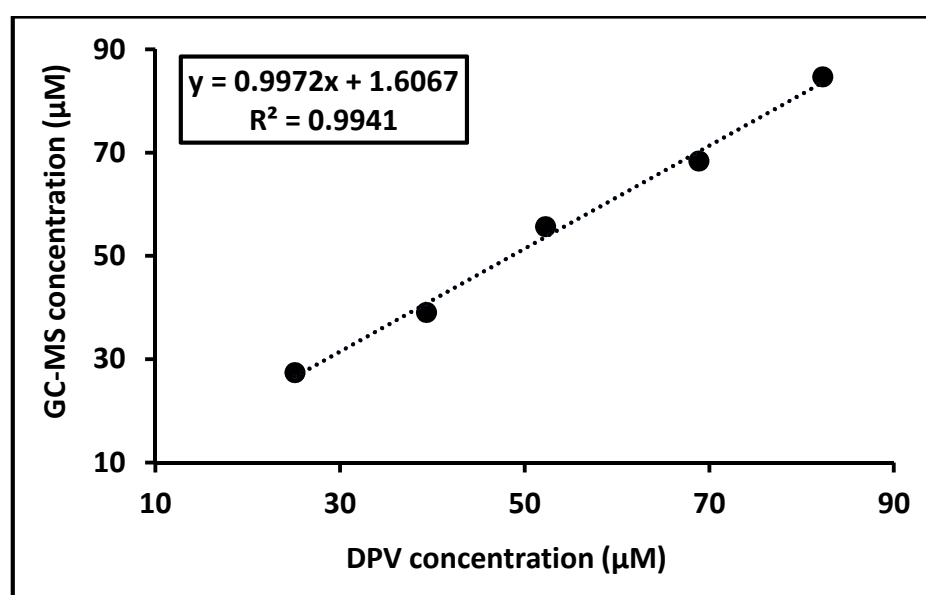

**Figure S4.** Comparison of concentration values 25, 40, 55, 70, and 85  $\mu\text{M}$  CFN obtained in the experimental set with GC/MS and DPV on CFN-MIP sensor ( $n = 3$  for each concentration).

The samples have been analysed by the two methods. If both methods are equivalent the slope is 1 and the intercept is 0. i.e.  $y=x$ . This would indicate both methods produce identical concentration values for the same sample.

**Table S1.** Intra-day and inter-day precision for seven concentrations of CFN using DPV measurements at CFN-MIP sensor.

| Concentration<br>( $\mu\text{M}$ ) | Intra-Day Precision             |         | Inter-Day Precision             |         |
|------------------------------------|---------------------------------|---------|---------------------------------|---------|
|                                    | Mean $\pm$ SD ( $\mu\text{M}$ ) | RSD (%) | Mean $\pm$ SD ( $\mu\text{M}$ ) | RDS (%) |
| 2                                  | 3.19 $\pm$ 0.73                 | 8.75%   | 2.98 $\pm$ 0.73                 | 13.1%   |
| 10                                 | 13.1 $\pm$ 1.6                  | 5.36%   | 11.6 $\pm$ 0.58                 | 10.3%   |
| 25                                 | 25.1 $\pm$ 0.48                 | 4.5%    | 21.1 $\pm$ 0.38                 | 8.17%   |
| 40                                 | 36.9 $\pm$ 0.75                 | 3.04%   | 36.5 $\pm$ 2.9                  | 3.58%   |
| 55                                 | 48.3 $\pm$ 0.35                 | 3.19%   | 49.8 $\pm$ 0.54                 | 4.88%   |
| 70                                 | 66.1 $\pm$ 0.47                 | 3.13%   | 68.4 $\pm$ 0.62                 | 4.03%   |
| 85                                 | 91.2 $\pm$ 0.48                 | 2.35%   | 87.7 $\pm$ 0.64                 | 3.22%   |

**Table S2.** Recovery experiments for various concentrations of CFN on CFN-MIP electrode using DPV measurements.

| Concentration<br>( $\mu\text{M}$ ) | Recovered Concentration (N=3)   |         |                          |
|------------------------------------|---------------------------------|---------|--------------------------|
|                                    | Mean $\pm$ SD ( $\mu\text{M}$ ) | RSD (%) | Recovered Percentage (%) |
| 2                                  | 2.27 $\pm$ 0.17                 | 11.15%  | 80.61%                   |
| 10                                 | 10.2 $\pm$ 1.4                  | 13.7%   | 102.02%                  |
| 25                                 | 25.1 $\pm$ 1.46                 | 5.83%   | 100.42%                  |
| 40                                 | 39.35 $\pm$ 2.35                | 5.96%   | 98.37%                   |
| 55                                 | 52.25 $\pm$ 4.65                | 8.57%   | 98.64%                   |
| 70                                 | 68.86 $\pm$ 6.03                | 8.75%   | 98.38%                   |
| 85                                 | 82.3 $\pm$ 4.96                 | 6.02%   | 96.82%                   |
